# Supplementary material for: A PN(Pz)P ligand protected Au2Cu2complex for photoluminescent ultra-low humidity detection with reversible single-crystal-to-single-crystal transformations
Source: Royal Society of Chemistry journal article supplement (doi:10.1039/d3qi00549f), 2023-01-01
Supplement: d3qi00549f1.pdf [file d3qi00549f1.pdf]

## Supporting Information

### **A PN(Pz)P Ligand Protected Au<sub>2</sub>Cu<sub>2</sub> Complex for Photoluminescent Ultra-low Humidity Detection with Reversible Single-crystal-to-single-crystal Transformations**

Shengnan Hu,<sup>1</sup> Sisi Yan,<sup>1</sup> Yuanyuan Hu,<sup>1</sup> Linlin Huang,<sup>1</sup> David James Young,<sup>2</sup> Hong-Xi Li,<sup>1</sup> Chengrong Lu,<sup>1\*</sup> Jing-Hui He,<sup>1\*</sup> and Zhi-Gang Ren<sup>1\*</sup>

---

<sup>1</sup> Suzhou Key Laboratory of Novel Semiconductor-Optoelectronics Materials and Devices, College of Chemistry, Chemical Engineering and Materials Science, Soochow University, Suzhou 215123, China

<sup>2</sup> Glasgow College UESTC, University of Science and Technology of China, No. 2006, Xiyuan Ave, West Hi-Tech Zone, Chendu, China

# Contents

|                  |     |                 |     |                                                                                                                                                                                      |     |
|------------------|-----|-----------------|-----|--------------------------------------------------------------------------------------------------------------------------------------------------------------------------------------|-----|
| Scheme S3        | S1. | Synthesis       | of  | 3-dppmapz-1-ol.                                                                                                                                                                      |     |
| Computational S3 |     |                 |     | methodology                                                                                                                                                                          |     |
| Table S1.        |     |                 |     | Selected crystallographic data and refinement parameter for <b>1</b> , <b>1</b> ·2H <sub>2</sub> O and <b>1</b> ·4MeOH.                                                              | S8  |
| Table S2.        |     |                 |     | Selected bond lengths (Å) of <b>1</b> , <b>1</b> ·2H <sub>2</sub> O and <b>1</b> ·4MeOH.                                                                                             | S8  |
| Fig. S1.         |     |                 |     | <sup>1</sup> H NMR spectra of 3-dppmapz-1-ol in DMSO- <i>d</i> <sub>6</sub> .                                                                                                        | S9  |
| Fig. S2.         | S2. | <sup>13</sup> C | NMR | spectra of 3-dppmapz-1-ol in DMSO- <i>d</i> <sub>6</sub> .                                                                                                                           | S9  |
| Fig. S3.         | S3. | <sup>31</sup> P | NMR | spectra of 3-dppmapz-1-ol in DMSO- <i>d</i> <sub>6</sub> .                                                                                                                           | S10 |
| Fig. S4.         |     |                 |     | IR spectra of 3-dppmapz-1-ol, <b>1</b> ·2H <sub>2</sub> O and <b>1</b> ·4MeOH.                                                                                                       | S10 |
| Fig. S5.         |     |                 |     | TGA curve of <b>1</b> ·2H <sub>2</sub> O from room temperature to 800°C.                                                                                                             | S11 |
| Fig. S6.         |     |                 |     | Solid-state emission spectra of <b>1</b> ·2H <sub>2</sub> O before and after grinding in air for 5 min.                                                                              | S11 |
| Fig. S7.         |     |                 |     | Solid-state emission spectra of <b>1</b> at 80–280 K under 365 nm excitation.                                                                                                        | S12 |
| Fig. S8.         |     |                 |     | Solid-state emission spectra of <b>1</b> ·2H <sub>2</sub> O at 80–280 K under 365 nm excitation.                                                                                     | S12 |
| Fig. S9.         |     |                 |     | Solid-state emission spectra of <b>1</b> ·4MeOH at 80–280 K under 365 nm excitation.                                                                                                 | S13 |
| Fig. S10.        |     |                 |     | The distribution of the HOMOs and LUMOs of <b>1</b> ·2H <sub>2</sub> O and <b>1</b> ·4MeOH.                                                                                          | S13 |
| Fig. S11.        |     |                 |     | Emission $\lambda_{\max}$ of <b>1</b> ·2H <sub>2</sub> O when treated with vacuum and air, alternatively.                                                                            | S14 |
| Fig. S12.        |     |                 |     | Solid-state emission spectra of <b>1</b> ·2H <sub>2</sub> O in NH <sub>3</sub> and TFA vapour at 30min time intervals.                                                               | S14 |
| Fig. S13.        |     |                 |     | PXRD patterns of <b>1</b> ·2H <sub>2</sub> O and <b>1</b> ·2H <sub>2</sub> O after exposure to NH <sub>3</sub> and TFA vapour.                                                       | S15 |
| Fig. S14.        |     |                 |     | Photo of the reflux equipment and partial magnification of the return line containing several crystals of <b>1</b> ·2H <sub>2</sub> O under natural light and 365 nm LED excitation. | S15 |

### Scheme S1. Synthesis of 3-dppmapz-1-ol.

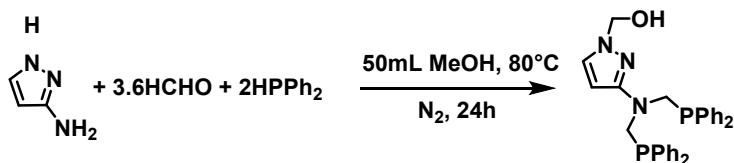

### Computational methodology

Theoretical calculations were performed by DFT and TD-DFT methods using the CP2K program<sup>[s1]</sup> (2023.1) and analyzed by the Multiwfn 3.8dev program. The input file for CP2K was also generated with Multiwfn<sup>[s2]</sup>.

#### 1. Optimization of ground state structure

Using the cif crystal structure data as the initial structure, the input file of CP2K was generated using the Multiwfn program. PBE0-D3(BJ) functional, DZVP-MOLOPT-SR-GTH base set, periodic and ADMM mode acceleration were used for structural optimization.

#### 2. Triplet state structure optimization

The ground state structure obtained by the above optimization was taken as the initial structure and set as the triplet state in Multiwfn. The UKS mode was used to optimize the structure with the same functional and base group, and the triplet state was thereby obtained.

#### 3. TDDFT calculation

The above optimization results were used to calculate the excited states of S0-S50 and T1-T50 respectively using the TD-DFT method. PBE0-D3(BJ) functional and TZVP-MOLOPT-GTH base set were then employed. The wavefunction file \*.molden was output for the Multiwfn wavefunction analysis.

#### 4. Orbit wavefunctions graphic

The grid file output from the Multiwfn program was imported into VESTA to calculate the HOMO, LUMO graphic.

### References

- [s1] T. D. Kuhne, M. Iannuzzi, M. Del Ben, V. V. Rybkin, P. Seewald, F. Stein, T. Laino, R. Z. Khaliullin, O. Schutt, F. Schiffmann, D. Golze, J. Wilhelm, S. Chulkov, M. H. Bani-Hashemian, V. Weber, U. Borstnik, M. Tailliefumier, A. S. Jakobovits, A. Lazzaro, H. Pabst, T. Muller, R. Schade, M. Guidon, S. Andermatt, N. Holmberg, G. K. Schenter, A. Hehn, A. Bussy, F. Belleflamme, G. Tabacchi, A. Gloss, M. Lass, I. Bethune, C. J. Mundy, C. Plessl, M. Watkins, J. VandeVondele, M. Krack and J. Hutter, CP2K: An electronic structure and molecular dynamics software package - Quickstep: Efficient and accurate electronic structure calculations, *J. Chem. Phys.*, 2020, **152**, 194103.
- [s2] T. Lu and F. Chen, Multiwfn: a multifunctional wavefunction analyzer, *J. Comput. Chem.*, 2012, **33**, 580-592.

### Cartesian Coordinates

```
1
CELL
1.1121489155579125E+01 0.0000000000000000E+00 0.0000000000000000E+00
3.9989687658713948E+00 1.1466017897776954E+01 0.0000000000000000E+00
4.1555353987692243E+00 5.4507843387310047E+00 1.1547750256204958E+01
Au 17.629152 16.797687 15.564295 C 15.378990 19.857146 9.874112 C 11.399274 17.034727 17.445932
Cu 20.140246 17.367571 10.978242 C 12.077271 17.671275 12.067857 C 11.291008 18.147421 19.843499
N 18.698936 22.376076 9.926965 H 11.080870 15.876981 12.161297 H 12.409358 19.812130 20.238536
N 17.921517 19.962238 10.182448 H 10.712467 19.168663 11.659721 C 30.761443 17.136516 21.704219
N 14.016027 17.493881 10.030197 C 12.683448 17.045510 7.590464 H 22.811989 7.715213 1.720206
P 13.560239 18.357028 15.144884 H 11.384403 18.601326 7.192136 C 29.332324 14.982696 21.215031
P 14.912502 16.732063 4.935075 H 11.604464 15.305562 7.757489 H 20.275988 3.918633 0.859570
P 25.562539 22.054445 11.397344 C 13.451195 21.734343 15.529760 C 8.463783 13.836551 18.858334
F 24.195984 20.379218 9.198360 C 11.122084 22.965178 15.756714 H 7.410547 12.129183 18.460301
F 23.268919 21.350272 13.321777 H 30.402978 21.893822 15.836199 C 9.992576 14.851485 16.972649
F 26.984252 23.563487 13.643998 C 32.053673 25.586549 15.829859 H 10.095541 13.890352 15.178284
F 27.930396 22.576813 9.498023 H 30.254982 26.541397 15.987579 C 15.353738 19.808228 3.530278
F 24.177619 24.557651 10.497648 C 13.266649 26.978037 15.677958 C 17.573468 21.126400 4.060857
F 27.056569 19.456421 12.328204 H 13.197201 29.019653 15.726332 H 18.999453 20.301697 5.273386
C 16.635118 23.756521 9.468955 C 15.583456 25.763440 15.437019 C 10.378637 1.875920 3.098112
H 16.805362 25.770834 9.228849 H 17.301055 26.851633 15.226783 H 12.076581 2.890179 3.611552
C 14.453578 22.252455 9.410977 C 15.680449 23.138088 15.367851 C 8.565265 2.957146 1.541815
H 12.522350 22.837074 9.152261 H 17.474179 22.192767 15.086317 H 8.850497 4.826126 0.758102
```

|    |           |           |           |   |           |           |           |   |           |           |           |
|----|-----------|-----------|-----------|---|-----------|-----------|-----------|---|-----------|-----------|-----------|
| C  | 6.358849  | 1.635588  | 0.969512  | F | 9.369844  | 12.511853 | 9.493888  | C | 7.093936  | 16.985432 | 0.607038  |
| H  | 4.958224  | 2.474762  | -0.255679 | C | 19.791262 | 8.211626  | 12.353234 | H | 16.150227 | 28.049511 | 20.962469 |
| C  | 13.518605 | 20.914121 | 1.975299  | H | 19.621027 | 6.197304  | 12.593331 | C | 27.962551 | 18.131544 | 2.963751  |
| H  | 11.816800 | 19.884737 | 1.512671  | C | 21.972819 | 9.715687  | 12.411144 | H | 29.015842 | 19.838865 | 3.361800  |
| C  | 13.235073 | 14.837122 | 2.635296  | H | 23.904047 | 9.131011  | 12.669898 | C | 26.433834 | 17.116585 | 4.849481  |
| C  | 13.821697 | 15.153723 | 0.075561  | C | 21.047342 | 12.110986 | 11.948035 | H | 26.330922 | 18.077677 | 6.643864  |
| H  | 15.121652 | 16.621694 | -0.488207 | C | 24.349049 | 14.296838 | 9.754257  | C | 21.072590 | 12.159976 | 18.291888 |
| C  | 20.611634 | 23.884247 | 20.081112 | H | 25.345472 | 16.091120 | 9.660793  | C | 18.852892 | 10.841727 | 17.761287 |
| H  | 21.102042 | 24.130859 | 18.110294 | H | 25.713838 | 12.799454 | 10.162376 | H | 17.426915 | 11.666523 | 16.548847 |
| C  | 18.964678 | 21.970009 | 20.808672 | C | 23.742900 | 14.922619 | 14.231646 | C | 26.047657 | 30.092203 | 18.723993 |
| H  | 18.163970 | 20.718943 | 19.400339 | H | 25.041932 | 13.366828 | 14.630053 | H | 24.349714 | 29.077938 | 18.210545 |
| C  | 10.514653 | 11.351890 | 1.522666  | H | 24.821923 | 16.662537 | 14.064640 | C | 27.861026 | 29.011034 | 20.280339 |
| H  | 9.237517  | 9.864535  | 2.104470  | C | 22.975135 | 10.233765 | 6.292381  | H | 27.575843 | 27.141978 | 21.063908 |
| C  | 11.560668 | 12.922068 | 3.348061  | C | 25.304230 | 9.002922  | 6.065356  | C | 30.067508 | 30.332528 | 20.852547 |
| H  | 11.084105 | 12.596546 | 5.299445  | H | 6.023351  | 10.074240 | 5.985879  | H | 31.468030 | 29.493409 | 22.077916 |
| Au | 18.797283 | 15.170556 | 6.257823  | C | 4.372628  | 6.381556  | 5.992237  | C | 22.907720 | 11.054047 | 19.846849 |
| Cu | 16.286031 | 14.600546 | 10.843864 | H | 6.171305  | 5.426701  | 5.834483  | H | 24.609571 | 12.083343 | 20.309492 |
| N  | 17.727429 | 9.592061  | 11.895220 | C | 23.159664 | 4.990072  | 6.144159  | C | 23.191273 | 17.131069 | 19.186848 |
| N  | 18.504813 | 12.005909 | 11.639723 | H | 23.229122 | 2.948455  | 6.095774  | C | 22.604641 | 16.814485 | 21.746588 |
| N  | 22.410313 | 14.474225 | 11.791931 | C | 20.842869 | 6.204682  | 6.385083  | H | 21.304699 | 15.346501 | 22.310365 |
| P  | 22.866110 | 13.611074 | 6.677257  | H | 19.125297 | 5.116469  | 6.595343  | C | 15.814707 | 8.083969  | 1.741025  |
| P  | 21.513906 | 15.236129 | 16.887056 | C | 20.745878 | 8.830033  | 6.454265  | H | 15.324312 | 7.837358  | 3.711849  |
| P  | 10.863786 | 9.913708  | 10.424649 | H | 18.952153 | 9.775355  | 6.735780  | C | 17.461630 | 9.982222  | 1.013430  |
| F  | 12.230401 | 11.588762 | 12.623630 | C | 25.027089 | 14.933370 | 4.376213  | H | 18.262383 | 11.249266 | 2.421751  |
| F  | 13.157471 | 10.617898 | 8.500252  | C | 25.135244 | 13.820718 | 1.978618  | C | 25.911638 | 20.616325 | 20.299430 |
| F  | 9.442142  | 8.404624  | 8.178035  | H | 24.016878 | 12.155999 | 1.583577  | H | 27.188797 | 22.103632 | 19.717599 |
| F  | 8.495973  | 9.391481  | 12.324121 | C | 5.664784  | 14.831623 | 0.117864  | C | 24.865649 | 19.046126 | 18.474051 |
| F  | 12.248616 | 7.410403  | 11.324231 | H | 13.614200 | 24.252928 | 20.101866 | H | 25.342193 | 19.371642 | 16.522664 |

1:2H<sub>2</sub>O

CELL

11.19697243 0.00000000 0.00000000  
-3.97447040 11.37045800 0.00000000  
-0.19012967 -6.05876594 11.78286775

|    |           |           |           |    |           |            |            |   |           |           |           |
|----|-----------|-----------|-----------|----|-----------|------------|------------|---|-----------|-----------|-----------|
| Au | 6.113532  | 4.205605  | 6.432235  | C  | -1.677500 | 5.966129   | 5.057921   | C | 9.406040  | 8.950213  | 10.118984 |
| Cu | 8.582731  | 3.659224  | 11.096892 | H  | -1.712751 | 6.826909   | 6.900541   | C | 12.713108 | 6.825430  | 12.349814 |
| P  | 2.061763  | 2.595329  | 6.822657  | C  | 3.691164  | 1.186903   | 18.579662  | H | 13.772412 | 5.070455  | 12.429373 |
| P  | 3.290669  | 4.235482  | 17.099027 | C  | 5.888779  | -0.192741  | 18.104831  | H | 14.029874 | 8.364519  | 11.953343 |
| P  | 14.413895 | -0.789097 | 11.148947 | H  | 7.323229  | 0.556777   | 16.853254  | C | 12.170197 | 6.149900  | 7.873121  |
| F  | 12.564793 | 0.823303  | 12.995038 | C  | 6.223064  | -2.565516  | 19.188954  | H | 13.473197 | 7.707734  | 7.494406  |
| F  | 12.390567 | -0.414922 | 8.862214  | H  | 7.888069  | -3.652968  | 18.7114174 | H | 13.263076 | 4.420628  | 8.072528  |
| F  | 16.268188 | -2.306495 | 9.272103  | C  | 4.394416  | -3.536603  | 20.801488  | C | 11.344254 | 10.806891 | 15.900086 |
| F  | 16.446200 | -1.065731 | 13.414391 | H  | 4.660964  | -5.366211  | 21.679482  | C | -7.467877 | 11.999574 | 16.140180 |
| F  | 13.056355 | -3.361685 | 11.961443 | C  | 2.203824  | -2.162620  | 21.305049  | H | -5.751965 | 10.894374 | 16.171126 |
| F  | 15.786308 | 1.866983  | 10.302633 | H  | 0.786781  | -2.921508  | 22.564780  | C | 0.166093  | -6.872605 | 16.305135 |
| N  | 7.208915  | -1.426803 | 12.117324 | C  | 1.840390  | 0.180029   | 20.183668  | H | 1.979949  | -5.944671 | 16.469700 |
| N  | 6.430775  | 0.996170  | 11.867471 | H  | 0.156218  | 1.255527   | 20.600495  | C | 19.107936 | -5.452732 | 16.263811 |
| N  | 2.497239  | 3.438689  | 11.966097 | C  | 1.574410  | 6.172335   | 19.339681  | H | -1.952289 | -3.416270 | 16.398352 |
| C  | 5.136228  | -2.810856 | 12.536327 | C  | 2.090353  | 5.888768   | 21.918590  | C | 16.768432 | -6.630396 | 16.041437 |
| H  | 5.288087  | -4.824388 | 12.780827 | H  | 3.390002  | 4.449287   | 22.556909  | H | 15.041899 | -5.538530 | 15.966904 |
| C  | 2.955335  | -1.312330 | 12.574163 | C  | 1.288670  | 18.892569  | 1.422588   | C | 9.129363  | 12.237771 | 15.849834 |
| H  | 1.024939  | -1.906484 | 12.823521 | H  | 1.693506  | 18.598470  | 3.403145   | H | 7.318335  | 11.318752 | 15.594503 |
| C  | 3.884537  | 1.087852  | 12.142382 | C  | -0.360037 | 20.777808  | 0.631931   | C | 13.399655 | 6.125259  | 17.734322 |
| C  | 0.577025  | 3.212559  | 9.912036  | H  | 6.269078  | 0.516884   | 2.014404   | C | 13.368735 | 7.129252  | 20.185114 |
| H  | -0.481813 | 4.967709  | 9.832156  | C  | -1.225177 | 9.637820   | 20.339870  | H | 12.137627 | 8.699739  | 20.631511 |
| H  | -0.739855 | 1.673661  | 10.308983 | H  | 5.011355  | -10.381397 | 19.705430  | C | -6.232504 | 6.130029  | 22.041299 |
| C  | 1.120457  | 3.887736  | 14.388660 | C  | -0.101077 | 8.064073   | 18.564569  | H | -5.886628 | 18.370174 | 1.655341  |
| H  | -0.182856 | 2.330112  | 14.766858 | H  | -0.525413 | 8.362696   | 16.597912  | C | -4.659492 | 4.090603  | 21.500460 |
| H  | 0.028154  | 5.617254  | 14.189824 | O  | 10.067944 | -5.971904  | 15.600678  | H | -3.093671 | 14.784867 | 0.702139  |
| C  | 1.944776  | -0.769461 | 6.362256  | H  | 10.083016 | -4.553625  | 14.451225  | C | 16.497351 | 3.058246  | 19.089802 |
| C  | 20.756533 | -1.961879 | 6.124277  | H  | 9.775286  | -7.404420  | 14.515520  | H | 17.669642 | 1.445104  | 18.640258 |
| H  | 19.040747 | -0.856330 | 6.094266  | Au | 7.176668  | 5.831285   | 15.829416  | C | 14.968738 | 4.073562  | 17.205094 |
| C  | 13.122279 | 16.910232 | 5.960104  | Cu | 4.707553  | 6.378960   | 11.164399  | H | 15.005700 | 3.213355  | 15.362245 |
| H  | 11.308123 | 15.982663 | 5.796720  | P  | 11.228128 | 7.442283   | 15.439258  | C | 9.598771  | 8.849838  | 3.682404  |
| C  | -5.819648 | 15.490112 | 6.000537  | P  | 9.999690  | 5.801369   | 5.162796   | C | 7.400526  | 10.228825 | 4.156363  |
| H  | 15.240264 | 13.453652 | 5.866787  | P  | -1.124806 | 10.826419  | 11.117459  | H | 5.965769  | 9.478731  | 5.407221  |
| C  | -3.479836 | 16.667497 | 6.221013  | F  | 0.724496  | 9.215740   | 9.271617   | C | 7.066147  | 12.601655 | 3.072460  |
| H  | -1.753395 | 15.575417 | 6.295053  | F  | 0.899399  | 10.452558  | 13.404503  | H | 5.400519  | 13.688583 | 3.545959  |
| C  | 4.159569  | -2.200587 | 6.411335  | F  | -2.977975 | 12.344344  | 12.993578  | C | 8.895435  | 13.573679 | 1.461189  |
| H  | 5.970837  | -1.281563 | 6.664940  | F  | -3.157501 | 11.100660  | 8.851161   | H | 8.628888  | 15.403422 | 0.583434  |
| C  | -0.109997 | 3.913339  | 4.528134  | F  | 0.231899  | 13.399831  | 10.304913  | C | 11.086790 | 12.200525 | 0.958670  |
| C  | -0.080855 | 2.909235  | 2.077358  | F  | -2.497989 | 8.170177   | 11.964401  | H | 12.504495 | 12.960370 | -0.299794 |
| H  | 1.149434  | 1.338269  | 1.630303  | N  | 6.081682  | 11.464556  | 10.143793  | C | 11.450138 | 9.857664  | 2.079677  |
| C  | 19.519737 | 3.909002  | 0.221974  | N  | 6.859738  | 9.041565   | 10.393073  | H | 13.134979 | 8.782814  | 1.663904  |
| H  | 19.172198 | -8.331491 | 20.608089 | N  | 10.793045 | 6.599520   | 10.825422  | C | 11.716409 | 3.864353  | 2.922639  |
| C  | 17.947912 | 5.949081  | 0.763567  | C  | 8.154442  | 12.848884  | 9.725822   | C | 11.202127 | 4.148271  | 0.343469  |
| H  | 16.381254 | -4.745125 | 21.562700 | H  | 8.002101  | 14.862634  | 9.482234   | H | 9.903547  | 5.588381  | -0.295646 |
| C  | -3.206878 | 6.981756  | 3.174057  | C  | 10.335550 | 11.350511  | 9.688309   | C | 12.004132 | -8.856170 | 20.840268 |
| H  | -4.378122 | 8.595370  | 3.624383  | H  | 12.265978 | 11.945512  | 9.439963   | H | 11.600093 | -8.562350 | 18.859578 |

|   |           |            |           |   |           |           |          |   |          |           |          |
|---|-----------|------------|-----------|---|-----------|-----------|----------|---|----------|-----------|----------|
| C | 13.651970 | -10.741740 | 21.631822 | H | 8.278564  | 20.417110 | 2.559235 | O | 3.221497 | 16.006981 | 6.664004 |
| H | 7.023143  | 9.518848   | 20.249871 | C | 13.390762 | 1.971984  | 3.698765 | H | 3.211004 | 14.586732 | 7.811121 |
| C | 14.515707 | 0.398109   | 1.924115  | H | 13.813331 | 1.673101  | 5.665783 | H | 3.512261 | 17.438011 | 7.751563 |

**1-4MeOH  
CELL**

1.1030408818561703E+01 0.0000000000000000E+00 0.0000000000000000E+00  
-4.2133616003297547E+00 1.2398809764419379E+01 0.0000000000000000E+00  
-1.1989028423230075E+00 -6.0755859522528031E+00 1.2070545967347677E+01

|    |           |           |           |    |           |           |           |   |           |           |           |
|----|-----------|-----------|-----------|----|-----------|-----------|-----------|---|-----------|-----------|-----------|
| Au | 5.188841  | 4.866797  | 6.774853  | C  | -1.406161 | -7.129919 | 15.844293 | H | -2.198222 | 1.582209  | 18.539491 |
| Cu | 3.351864  | 7.269750  | 11.128558 | H  | 0.345353  | -6.074170 | 15.830825 | C | -0.095709 | -1.607677 | 19.861855 |
| P  | 9.072980  | 6.611983  | 5.832480  | C  | 11.551021 | 13.682538 | 16.015429 | H | -1.763639 | -2.710821 | 20.280738 |
| P  | 9.387678  | 8.908913  | 15.957939 | H  | -7.490179 | 12.725517 | 16.137532 | C | 2.296777  | -2.634855 | 20.266304 |
| P  | -2.797878 | 11.414090 | 9.810331  | C  | 11.244105 | 7.942835  | 18.654263 | H | 2.472879  | -4.544899 | 20.977159 |
| F  | -0.636737 | 9.955434  | 8.228169  | C  | 10.491782 | 8.896394  | 21.010219 | C | 4.444720  | -1.224616 | 19.732925 |
| F  | -1.116676 | 11.144433 | 12.351857 | H  | 8.978780  | 10.269778 | 21.125219 | H | 6.312534  | -2.015296 | 19.983481 |
| F  | -5.014773 | 12.828991 | 11.415245 | C  | 13.938626 | 19.561184 | 0.395566  | C | 4.212925  | 1.221799  | 18.796845 |
| F  | -4.529314 | 11.628266 | 7.286409  | H  | 13.348987 | 20.298101 | 2.207535  | H | 5.886266  | 2.307022  | 18.339895 |
| F  | -1.509801 | 14.111579 | 9.198698  | C  | -4.972883 | 17.777990 | 0.265963  | C | -0.266549 | 7.289361  | 19.120547 |
| F  | -4.162879 | 8.719282  | 10.455990 | H  | -4.034457 | 17.149562 | 1.970817  | C | -0.262817 | 6.735999  | 21.706032 |
| N  | 4.704921  | 12.294992 | 9.937882  | C  | -6.485288 | 5.362854  | 20.744811 | H | 0.641107  | 5.039543  | 22.398193 |
| N  | 5.517108  | 9.933838  | 10.462524 | H  | -4.969392 | 4.003342  | 20.639070 | C | 0.819722  | 19.843123 | 0.586948  |
| N  | 9.488515  | 7.597965  | 10.933001 | C  | 13.197202 | 6.176168  | 18.533528 | H | 0.805656  | 19.371169 | 2.571638  |
| C  | 6.776575  | 13.708042 | 9.607866  | H  | 13.816443 | 5.396802  | 16.755171 | C | -2.626271 | 10.544268 | 22.534849 |
| H  | 6.607495  | 15.682102 | 9.137194  | C  | 7.356184  | -7.075676 | 15.512449 | H | 6.706437  | -0.136475 | 1.057741  |
| C  | 8.987640  | 12.286036 | 9.917406  | H  | 7.736215  | -5.656252 | 16.951630 | C | -2.631750 | 11.108553 | 19.969012 |
| H  | 10.920780 | 12.905417 | 9.784145  | H  | 7.835796  | -6.284840 | 13.666155 | H | -3.502668 | 12.820007 | 19.263955 |
| C  | 8.081916  | 9.897725  | 10.452741 | H  | 0.586253  | 14.698869 | 15.845304 | C | -1.447032 | 9.495779  | 18.264373 |
| C  | 11.060512 | 6.968217  | 8.670166  | O  | 4.744348  | -7.696582 | 15.691398 | H | -1.431909 | 9.995200  | 16.285132 |
| H  | 12.052188 | 5.200616  | 9.028143  | H  | -3.655515 | 14.756676 | 14.219511 | C | 1.321471  | -0.352423 | 6.786895  |
| H  | 12.459648 | 8.447894  | 8.334802  | C  | -0.936203 | 12.541419 | 2.500610  | C | 3.642256  | -1.599830 | 6.881408  |
| C  | 11.203344 | 8.009569  | 13.136225 | H  | -0.041544 | 10.750923 | 3.003568  | H | 5.380143  | -0.518179 | 6.909381  |
| H  | 12.579262 | 9.487963  | 12.714643 | H  | -0.527833 | 12.931725 | 0.523900  | C | -4.256442 | 19.207813 | 7.031854  |
| H  | 12.206957 | 6.258173  | 13.498223 | H  | -2.977815 | 12.344252 | 2.740813  | H | -2.465053 | 18.233405 | 7.129937  |
| C  | 8.793040  | 9.698149  | 4.438499  | O  | 0.037068  | 14.592382 | 3.925708  | C | -6.499333 | 17.839704 | 7.100863  |
| H  | 10.953619 | 11.127600 | 3.902249  | H  | -0.027159 | 14.134043 | 5.688649  | H | -6.434900 | 15.803335 | 7.259576  |
| H  | 12.814882 | 10.366966 | 4.270519  | Au | 5.427881  | 7.082304  | 16.035203 | C | 12.022837 | 19.079036 | 6.965715  |
| C  | 10.712320 | 13.556808 | 2.948143  | Cu | 7.264867  | 4.679358  | 11.681395 | H | 10.271327 | 18.023280 | 6.979247  |
| H  | 12.380235 | 14.659973 | 2.529261  | P  | 1.543707  | 5.337126  | 16.977492 | C | -0.934329 | -1.733415 | 6.794608  |
| C  | 8.319819  | 14.583949 | 2.543693  | P  | 1.229033  | 3.040220  | 6.852044  | H | 18.106872 | -0.776382 | 6.672519  |
| H  | 8.143692  | 16.493993 | 1.832850  | P  | 13.413748 | 0.534830  | 13.000415 | C | -0.627407 | 4.006253  | 4.155713  |
| C  | 6.171898  | 13.173686 | 3.077083  | F  | 11.252748 | 1.993643  | 14.082184 | C | 0.124881  | 3.052667  | 1.799755  |
| H  | 4.304064  | 13.964318 | 2.826518  | F  | 11.732993 | 0.804611  | 10.458546 | H | 1.637844  | 1.679244  | 1.684764  |
| C  | 6.403727  | 10.727268 | 4.013145  | F  | 15.630956 | -0.879626 | 11.395737 | C | -3.321967 | -7.612116 | 22.414409 |
| H  | 4.730394  | 9.642022  | 4.470102  | F  | 15.145187 | 0.320713  | 15.524277 | H | -2.732365 | -8.349074 | 20.602448 |
| C  | 10.883232 | 4.659715  | 3.689450  | F  | 12.125767 | -2.162954 | 13.611782 | C | 15.589594 | -5.828870 | 22.544010 |
| C  | 10.879593 | 5.213068  | 1.103959  | F  | 14.779093 | 3.229669  | 12.354582 | H | 14.651147 | -5.200464 | 20.839154 |
| H  | 9.975727  | 6.909525  | 0.411738  | N  | 5.911769  | -0.345835 | 12.872043 | C | 17.102036 | 6.586299  | 2.065157  |
| C  | 9.797099  | -7.894060 | 22.223068 | N  | 5.099598  | 2.015302  | 12.347392 | H | 15.586177 | 7.945849  | 2.170889  |
| H  | 9.811240  | -7.422107 | 20.238371 | N  | 11.281817 | 4.351165  | 11.876967 | C | -2.580461 | 5.772971  | 4.276438  |
| C  | 13.243051 | 1.404796  | 0.275222  | C  | 3.840148  | -1.758897 | 13.202082 | H | -3.199651 | 6.552372  | 6.054797  |
| H  | 3.910382  | 12.085552 | 21.752338 | H  | 4.009263  | -3.732952 | 13.672767 | C | 3.260548  | 19.024811 | 7.297571  |
| C  | 13.248395 | 0.840501  | 2.841064  | C  | 1.629055  | -0.336906 | 12.892558 | H | 2.880552  | 17.605290 | 5.858467  |
| H  | 14.119250 | -0.870963 | 3.546164  | H  | -0.304050 | -0.956336 | 13.025858 | H | 2.780959  | 18.234079 | 9.143913  |
| C  | 12.063632 | 2.453274  | 4.545678  | C  | 2.534798  | 2.051414  | 12.357207 | H | 10.030436 | -2.749801 | 6.964558  |
| H  | 12.048409 | 1.953838  | 6.524922  | C  | -0.443802 | 4.980926  | 14.139789 | O | 5.872383  | 19.645780 | 7.118641  |
| C  | 9.295232  | 12.301540 | 16.023105 | H  | -1.435501 | 6.748519  | 13.781809 | H | 14.272240 | -2.807517 | 8.590556  |
| C  | 6.974440  | 13.548915 | 15.928495 | H  | -1.842982 | 3.501281  | 14.475140 | C | 11.552795 | -0.592345 | 20.309487 |
| H  | 5.236577  | 12.467223 | 15.900490 | C  | -0.586648 | 3.939570  | 9.673758  | H | 10.658119 | 1.198129  | 19.806519 |
| C  | 14.873109 | -7.258731 | 15.778028 | H  | -1.962531 | 2.461132  | 10.095334 | H | 11.144297 | -0.982757 | 22.286145 |
| H  | 13.081706 | -6.284352 | 15.679927 | H  | -1.590277 | 5.690974  | 9.311798  | H | 13.594413 | -0.395099 | 20.069416 |
| C  | 17.115998 | -5.890615 | 15.709069 | C  | 1.823631  | 2.250950  | 18.371471 | O | 10.579658 | -2.643247 | 18.884231 |
| H  | 17.051540 | -3.854246 | 15.550362 | C  | -0.336971 | 0.821531  | 18.907728 | H | 10.644132 | -2.184885 | 17.121312 |

**Triplet for 1  
CELL**

10.97544182 0.00000000 0.00000000  
3.61735786 11.40140194 0.00000000  
3.84669792 5.35682306 11.62018304

|    |           |           |           |   |           |           |           |   |           |           |           |
|----|-----------|-----------|-----------|---|-----------|-----------|-----------|---|-----------|-----------|-----------|
| Au | 16.802553 | 16.601325 | 15.579899 | F | 26.790632 | 22.362626 | 9.555165  | C | 11.903828 | 16.893747 | 7.573504  |
| Cu | 19.217254 | 17.249093 | 10.890760 | F | 22.985353 | 24.207232 | 10.471003 | H | 10.645622 | 18.460139 | 7.107017  |
| N  | 17.623260 | 22.453925 | 10.213825 | F | 26.042541 | 19.281188 | 12.407553 | H | 10.787030 | 15.181817 | 7.731729  |
| N  | 16.956349 | 20.008384 | 10.408892 | C | 15.518543 | 23.733031 | 9.653948  | C | 12.565370 | 21.518529 | 15.576337 |
| N  | 13.151932 | 17.357386 | 10.048486 | H | 15.593982 | 25.753089 | 9.436347  | C | 10.204167 | 22.696704 | 15.770081 |
| P  | 12.713438 | 18.146872 | 15.166447 | C | 13.423991 | 22.123144 | 9.464715  | H | 29.232145 | 21.585762 | 15.792616 |
| P  | 14.211929 | 16.509593 | 4.947590  | H | 11.481808 | 22.617199 | 9.112955  | C | 30.799923 | 25.312082 | 15.899184 |
| P  | 24.443702 | 21.787303 | 11.438823 | C | 14.442255 | 19.769751 | 9.953163  | H | 28.978463 | 26.225630 | 16.043478 |
| F  | 23.132096 | 19.985130 | 9.255675  | C | 11.215495 | 17.465803 | 12.082772 | C | 12.262214 | 26.753416 | 15.829683 |
| F  | 22.135432 | 20.951841 | 13.312489 | H | 10.233696 | 15.664842 | 12.158505 | H | 12.142474 | 28.791515 | 15.917685 |
| F  | 25.724058 | 23.374583 | 13.709559 | H | 9.836929  | 18.958824 | 11.716357 | C | 14.608627 | 25.591194 | 15.630573 |

|   |           |           |           |    |           |           |           |   |           |           |           |
|---|-----------|-----------|-----------|----|-----------|-----------|-----------|---|-----------|-----------|-----------|
| H | 16.311089 | 26.714589 | 15.500317 | H  | 10.279543 | 12.450132 | 5.333033  | C | 20.070284 | 8.732202  | 6.434768  |
| C | 14.765526 | 22.969634 | 15.511011 | Au | 18.070111 | 15.084849 | 6.418656  | H | 18.264903 | 9.663164  | 6.688593  |
| H | 16.585289 | 22.067594 | 15.271383 | Cu | 15.674820 | 14.411296 | 10.805216 | C | 24.341406 | 14.868051 | 4.408656  |
| C | 10.602825 | 16.809936 | 17.505283 | N  | 17.108741 | 9.328146  | 12.156837 | C | 24.416112 | 13.803888 | 1.985776  |
| C | 10.499860 | 17.941916 | 19.895398 | N  | 17.829073 | 11.748977 | 11.867724 | H | 23.299733 | 12.140559 | 1.578097  |
| H | 11.570556 | 19.644152 | 20.261317 | N  | 21.717055 | 14.289148 | 11.842899 | C | 5.166803  | 14.867348 | 0.113466  |
| C | 29.750146 | 16.905533 | 21.788437 | P  | 22.137213 | 13.545758 | 6.664525  | H | 12.510071 | 24.139924 | 20.220161 |
| H | 22.382308 | 7.679470  | 1.659468  | P  | 20.705720 | 15.073507 | 16.913236 | C | 6.559159  | 17.046293 | 0.603946  |
| C | 28.382617 | 14.703532 | 21.342838 | P  | 10.389932 | 9.866080  | 10.520632 | H | 14.969446 | 27.989423 | 21.077664 |
| H | 19.963903 | 3.791433  | 0.879663  | F  | 11.697444 | 11.616152 | 12.721865 | C | 27.193238 | 18.140538 | 2.986642  |
| C | 7.784002  | 13.543312 | 18.992178 | F  | 12.709903 | 10.712899 | 8.650154  | H | 28.227037 | 19.857684 | 3.391343  |
| H | 6.777583  | 11.802142 | 18.624958 | F  | 9.114733  | 8.290532  | 8.242700  | C | 25.741165 | 17.053178 | 4.892313  |
| C | 9.242386  | 14.590321 | 17.071605 | F  | 8.027123  | 9.298762  | 12.396791 | H | 25.678782 | 17.963815 | 6.713123  |
| H | 9.331507  | 13.629258 | 15.278391 | F  | 11.845266 | 7.438417  | 11.478470 | C | 20.289010 | 12.011269 | 18.351194 |
| C | 14.612524 | 19.616055 | 3.578259  | F  | 8.807914  | 12.385094 | 9.553706  | C | 18.078799 | 10.653179 | 17.891847 |
| C | 16.761608 | 21.012904 | 4.201623  | C  | 19.219535 | 7.983516  | 12.491736 | H | 16.619279 | 11.427715 | 16.688970 |
| H | 18.176832 | 20.223251 | 5.449907  | H  | 19.101912 | 5.967633  | 12.732291 | C | 24.600305 | 29.804320 | 18.927437 |
| C | 10.231041 | 1.908899  | 3.283406  | C  | 21.374850 | 9.524472  | 12.428536 | H | 22.900004 | 28.763002 | 18.482556 |
| H | 11.873327 | 2.980715  | 3.859849  | H  | 23.327471 | 8.969757  | 12.578075 | C | 26.450644 | 28.782221 | 20.481494 |
| C | 8.424974  | 2.951981  | 1.687706  | C  | 20.386257 | 11.905520 | 12.020910 | H | 26.196966 | 26.939039 | 21.335658 |
| H | 8.658443  | 4.848182  | 0.954759  | C  | 23.638090 | 14.134252 | 9.793450  | C | 28.649515 | 30.146237 | 20.980070 |
| C | 6.296031  | 1.554672  | 1.019747  | H  | 24.675070 | 15.905126 | 9.751375  | H | 30.080685 | 29.361190 | 22.206884 |
| H | 4.901383  | 2.357492  | -0.237490 | H  | 24.972299 | 12.603346 | 10.155549 | C | 22.160606 | 10.966685 | 19.906422 |
| C | 12.796566 | 20.678738 | 1.974757  | C  | 22.993574 | 14.726641 | 14.295677 | H | 23.848049 | 12.035803 | 20.322162 |
| H | 11.154758 | 19.591566 | 1.438603  | H  | 24.279241 | 13.212578 | 14.751159 | C | 22.313065 | 17.007193 | 19.227815 |
| C | 12.490611 | 14.623609 | 2.666523  | H  | 24.076043 | 16.498082 | 14.150991 | C | 21.672841 | 16.700013 | 21.776438 |
| C | 13.117836 | 14.878545 | 0.107973  | C  | 22.283239 | 10.162132 | 6.300645  | H | 20.378399 | 15.219183 | 22.321796 |
| H | 14.451965 | 16.314553 | -0.458075 | C  | 24.625212 | 8.955026  | 6.090023  | C | 15.412960 | 8.169435  | 1.624371  |
| C | 19.334998 | 23.414316 | 20.264900 | H  | 5.607608  | 10.049047 | 6.029225  | H | 14.883832 | 7.928272  | 3.603511  |
| H | 19.852050 | 23.630254 | 18.298088 | C  | 4.001019  | 6.334343  | 5.995931  | C | 17.060613 | 10.093326 | 0.941449  |
| H | 17.661053 | 21.524633 | 21.001445 | H  | 5.810125  | 5.398852  | 5.837492  | H | 17.813356 | 11.369798 | 2.355623  |
| C | 16.863892 | 20.261484 | 19.602721 | C  | 22.526190 | 4.918596  | 6.120640  | C | 24.980034 | 20.523038 | 20.375497 |
| C | 9.766109  | 11.127253 | 1.575511  | H  | 22.618509 | 2.878390  | 6.055669  | H | 26.257690 | 22.018360 | 19.815368 |
| H | 8.467805  | 9.661338  | 2.164674  | C  | 20.194721 | 6.109286  | 6.351926  | C | 23.986617 | 18.931937 | 18.539944 |
| C | 10.794762 | 12.728580 | 3.385033  | H  | 18.485172 | 5.003514  | 6.531941  | H | 24.507027 | 19.238472 | 16.598040 |

**Triplet for 1-2H<sub>2</sub>O  
CELL**

|                         |                         |                        |                        |
|-------------------------|-------------------------|------------------------|------------------------|
| 1.1036705208502834E+01  | 0.0000000000000000E+00  | 0.0000000000000000E+00 | 0.0000000000000000E+00 |
| -3.3623672291754594E+00 | 1.1368278169639343E+01  | 0.0000000000000000E+00 | 0.0000000000000000E+00 |
| -4.5830841964142544E-01 | -6.0444900166508022E+00 | 1.1792851243773342E+01 | 0.0000000000000000E+00 |
| Au                      | 6.246027                | 4.139285               | 6.598537               |
| Cu                      | 8.554873                | 3.618166               | 11.108586              |
| P                       | 2.166660                | 2.601808               | 6.789073               |
| P                       | 3.471970                | 4.349891               | 17.059748              |
| P                       | 14.107192               | -0.713977              | 11.131103              |
| F                       | 12.280135               | 1.106520               | 12.898302              |
| F                       | 12.062771               | -0.296098              | 8.864534               |
| F                       | 15.852696               | -2.387979              | 9.295850               |
| F                       | 16.124895               | -0.939123              | 13.416993              |
| F                       | 12.657703               | -3.165888              | 12.075698              |
| F                       | 15.599997               | 1.828906               | 10.196229              |
| N                       | 7.110009                | -1.572605              | 12.446015              |
| N                       | 6.434812                | 0.870157               | 12.125674              |
| N                       | 2.547565                | 3.429694               | 11.972128              |
| C                       | 4.969102                | -2.886139              | 12.729019              |
| H                       | 5.042377                | -4.898763              | 13.004770              |
| C                       | 2.844831                | -1.319062              | 12.603034              |
| H                       | 0.885060                | -1.935210              | 12.730968              |
| C                       | 3.877442                | 1.047651               | 12.212497              |
| C                       | 0.647729                | 3.192046               | 9.909794               |
| H                       | -0.448543               | 4.922514               | 9.836455               |
| H                       | -0.638359               | 1.627316               | 10.288404              |
| C                       | 1.239475                | 3.971285               | 14.399100              |
| H                       | -0.064683               | 2.442732               | 14.877218              |
| H                       | 0.165952                | 5.706749               | 14.191016              |
| C                       | 1.915733                | -0.766373              | 6.361566               |
| C                       | 20.385183               | -1.880316              | 6.137781               |
| H                       | 18.706356               | -0.718524              | 6.130016               |
| C                       | 13.815763               | 16.993586              | 5.954712               |
| H                       | 11.970531               | 16.129534              | 5.789839               |
| C                       | -4.874763               | 15.497626              | 5.984854               |
| H                       | 15.810358               | 13.466852              | 5.836869               |
| C                       | -2.495866               | 16.594347              | 6.211405               |
| H                       | -0.804430               | 15.449919              | 6.280715               |
| C                       | 4.076490                | -2.276299              | 6.402035               |
| H                       | 5.920233                | -1.418231              | 6.632744               |
| C                       | 0.016307                | 3.981229               | 4.513077               |
| C                       | -0.052626               | 2.937001               | 2.080232               |
| H                       | 1.052279                | 1.270366               | 1.658608               |
| H                       | 19.318285               | 4.021150               | 0.214728               |
| H                       | 18.376323               | -8.235163              | 20.640021              |
| C                       | 17.931166               | 6.200800               | 0.719027               |
| H                       | 15.922730               | -4.391002              | 21.525699              |
| C                       | -2.816608               | 7.277381               | 3.109188               |
| H                       | -3.838381               | 8.997160               | 3.531393               |
| C                       | -1.376374               | 6.164810               | 5.008126               |
| H                       | -1.330116               | 7.054460               | 6.835672               |
| C                       | 3.847057                | 1.303120               | 18.545666              |
| C                       | 6.065672                | -0.073305              | 18.191773              |
| H                       | 7.581504                | 0.694100               | 17.055217              |
| C                       | 6.314697                | -2.468525              | 19.247894              |
| H                       | 8.008072                | -3.549760              | 18.879823              |
| C                       | 4.377907                | -3.470364              | 20.707601              |
| H                       | 4.575877                | -5.322680              | 21.556288              |
| C                       | 2.173330                | -2.084809              | 21.113151              |
| H                       | 0.680261                | -2.856404              | 22.275430              |
| C                       | 1.901725                | 0.285767               | 20.027444              |
| H                       | 0.215061                | 1.379626               | 20.374327              |
| C                       | 1.811607                | 6.302372               | 19.323052              |
| C                       | 2.410824                | 6.008081               | 21.882981              |
| H                       | 3.709393                | 4.544748               | 22.463298              |
| C                       | 2.209058                | 19.000905              | 1.407579               |
| H                       | 2.689917                | 18.710295              | 3.371703               |
| C                       | 0.557590                | 20.909193              | 0.675577               |
| H                       | 6.112948                | 0.681227               | 20.842330              |
| C                       | -0.907245               | 9.797390               | 20.422245              |
| H                       | 4.168486                | -10.199753             | 19.839253              |
| C                       | 0.129374                | 8.209663               | 18.605161              |
| H                       | -0.362656               | 8.503455               | 16.653658              |
| O                       | 9.637075                | -6.027001              | 15.382862              |
| H                       | 9.416072                | -4.471036              | 14.444264              |
| H                       | 9.807888                | -7.291207              | 14.084370              |
| Au                      | 7.370076                | 5.923655               | 15.772110              |
| Cu                      | 5.012591                | 6.429689               | 10.969602              |
| P                       | 11.469441               | 7.461380               | 15.408229              |
| P                       | 10.092139               | 5.629699               | 5.161549               |
| P                       | -0.447294               | 10.776756              | 11.163606              |
| F                       | 1.377445                | 8.943242               | 9.389942               |
| F                       | 1.578291                | 10.351511              | 13.423791              |
| F                       | -2.211999               | 12.445191              | 12.983287              |
| F                       | -2.418036               | 11.000875              | 8.854163               |
| F                       | 0.995313                | 13.229768              | 10.213710              |
| F                       | -1.960045               | 8.232525               | 12.085721              |
| N                       | 6.573262                | 11.718056              | 10.266867              |
| N                       | 7.220995                | 9.258166               | 10.497926              |
| N                       | 11.055886               | 6.614574               | 10.276573              |
| C                       | 8.701303                | 12.980527              | 9.747247               |
| H                       | 8.653496                | 14.995607              | 9.492315               |
| C                       | 10.785790               | 11.361600              | 9.621662               |
| H                       | 12.732288               | 11.850100              | 9.284480               |
| C                       | 9.745468                | 9.016215               | 10.108761              |
| C                       | 12.976434               | 6.817244               | 12.319079              |
| H                       | 14.040262               | 5.067999               | 12.409055              |
| H                       | 14.289465               | 8.362730               | 11.941820              |
| C                       | 12.339996               | 6.079817               | 7.828234               |
| H                       | 13.621020               | 7.622546               | 7.341511               |
| H                       | 13.443690               | 4.364923               | 8.048642               |
| C                       | 11.701706               | 10.819044              | 15.869643              |
| C                       | -6.759596               | 11.920100              | 16.094098              |
| H                       | -5.084212               | 10.753513              | 16.088339              |
| C                       | -0.181303               | -6.957694              | 16.292715              |
| H                       | 1.667822                | -6.101259              | 16.453892              |
| C                       | 18.513439               | -5.453935              | 16.284150              |
| H                       | -2.160537               | -3.425142              | 16.443107              |
| C                       | 16.129900               | -6.538741              | 16.065021              |
| H                       | 14.441489               | -5.388300              | 16.014297              |
| C                       | 9.545445                | 12.333728              | 15.852743              |
| H                       | 7.698679                | 11.487544              | 15.612685              |
| C                       | 13.551936               | 6.075365               | 17.743604              |
| C                       | 13.628591               | 7.157176               | 20.158796              |
| H                       | 12.546458               | 8.843987               | 20.557910              |
| C                       | -5.742658               | 6.089467               | 22.037842              |
| H                       | -4.795726               | 18.367692              | 16.602964              |
| C                       | -4.358380               | 3.904515               | 21.556028              |
| H                       | -2.344124               | 14.516041              | 0.755864               |
| C                       | 16.377166               | 2.791894               | 19.181856              |
| H                       | 17.391346               | 1.063237               | 18.778643              |

|   |           |           |           |   |           |           |           |   |           |            |           |
|---|-----------|-----------|-----------|---|-----------|-----------|-----------|---|-----------|------------|-----------|
| C | 14.929616 | 3.876719  | 17.275201 | C | 11.408521 | 12.126608 | 1.188395  | C | 13.148535 | -10.874322 | 21.582935 |
| H | 14.872619 | 2.961005  | 15.461575 | H | 12.892575 | 12.900872 | 0.016334  | H | 7.628090  | 9.370443   | 20.181971 |
| C | 9.739023  | 8.706601  | 3.718123  | C | 11.664548 | 9.726777  | 2.216772  | C | 14.606236 | 0.253405   | 1.838754  |
| C | 7.553793  | 10.114674 | 4.156844  | H | 13.329662 | 8.617944  | 1.816677  | H | 9.550619  | 20.272142  | 2.431458  |
| H | 6.053402  | 9.344796  | 5.315659  | C | 11.844224 | 3.725461  | 2.918025  | C | 13.548946 | 1.841654   | 3.645859  |
| C | 7.315284  | 12.532338 | 3.152991  | C | 11.245610 | 3.989698  | 0.353464  | H | 14.047377 | 1.567164   | 5.599236  |
| H | 5.653132  | 13.638931 | 3.582977  | H | 9.916373  | 5.421957  | -0.233968 | O | 4.001417  | 16.118924  | 6.860576  |
| C | 9.237485  | 13.535952 | 1.671988  | C | 11.473300 | -8.990827 | 20.836456 | H | 4.139195  | 14.648622  | 7.937195  |
| H | 9.053337  | 15.415099 | 0.882000  | H | 10.991187 | -8.711111 | 18.870430 | H | 4.115088  | 17.517194  | 8.018180  |

Triplet for 1-4MeOH

CELL

12.01637485 0.00000000 0.00000000

-4.69961786 13.17957400 0.00000000

-1.50006367 -6.10678794 12.92039636

|    |           |           |           |    |           |           |           |   |           |           |            |
|----|-----------|-----------|-----------|----|-----------|-----------|-----------|---|-----------|-----------|------------|
| Au | 5.410555  | 5.564826  | 7.521619  | C  | -2.184812 | -7.907076 | 17.055796 | H | -2.319346 | 2.367834  | 19.469278  |
| Cu | 3.683162  | 8.121436  | 12.094347 | H  | -0.404588 | -6.897135 | 17.101151 | C | -0.224370 | -0.786291 | 20.896657  |
| P  | 9.390312  | 7.296964  | 6.706591  | C  | 11.648668 | 14.372493 | 17.140174 | H | -1.901353 | -1.867686 | 21.343251  |
| P  | 9.391671  | 9.618363  | 16.975668 | H  | -9.275585 | 13.378306 | 17.282217 | C | 2.163664  | -1.803705 | 21.355620  |
| P  | -3.398293 | 12.378979 | 10.364071 | C  | 11.386378 | 8.767551  | 19.640504 | H | 2.333485  | -3.683904 | 22.142136  |
| F  | -1.268281 | 10.814559 | 8.762198  | C  | 10.629782 | 9.740089  | 21.989337 | C | 4.321976  | -0.416000 | 20.794683  |
| F  | -1.705965 | 12.043382 | 12.913988 | H  | 8.995849  | 10.967284 | 22.100920 | H | 6.184620  | -1.203524 | 21.106484  |
| F  | -5.529995 | 13.908883 | 11.994980 | C  | 14.786533 | 20.677473 | -0.243049 | C | 4.094464  | 1.998373  | 19.775811  |
| F  | -5.096772 | 12.679477 | 7.834300  | H  | 14.189336 | 21.444321 | 15.757421 | H | 5.770420  | 3.086218  | 19.3750116 |
| F  | -1.968532 | 14.993775 | 9.751062  | C  | -5.826183 | 19.082554 | -0.371449 | C | -0.469371 | 8.032141  | 19.831579  |
| F  | -4.833738 | 9.736042  | 10.994289 | H  | -4.779969 | 18.619836 | 1.324920  | C | -0.645434 | 7.467073  | 22.412152  |
| N  | 5.078165  | 13.107644 | 10.185757 | C  | -7.910390 | 6.565966  | 21.726670 | H | 0.213696  | 5.767270  | 23.152273  |
| N  | 5.814589  | 10.761849 | 10.833072 | H  | -6.274769 | 5.346436  | 21.611930 | C | 0.920735  | 20.632012 | -0.375429  |
| N  | 9.660294  | 8.382396  | 11.825366 | C  | 13.478948 | 7.164399  | 19.525754 | H | 0.782042  | 20.145619 | 1.607296   |
| C  | 7.176632  | 14.515738 | 10.124245 | H  | 14.108809 | 6.354457  | 17.761497 | C | -3.004441 | 11.300897 | 23.114244  |
| H  | 7.073137  | 16.489131 | 9.619651  | C  | 7.270537  | -7.054369 | 16.565146 | H | 7.726468  | -0.802026 | -0.030583  |
| C  | 9.327491  | 13.099118 | 10.752339 | H  | 7.455234  | -5.785293 | 18.178317 | C | -2.825980 | 11.885033 | 20.556015  |
| H  | 11.259961 | 13.729323 | 10.855954 | H  | 7.920524  | -6.058805 | 14.874037 | H | -3.656116 | 13.603288 | 19.813372  |
| C  | 8.355362  | 10.720121 | 11.196935 | H  | -0.391595 | 16.208692 | 16.868663 | C | -1.559953 | 10.262650 | 18.917043  |
| C  | 11.288783 | 7.628859  | 9.636415  | O  | 4.678740  | -7.755941 | 16.391609 | H | -1.418999 | 10.770568 | 16.942455  |
| H  | 12.200722 | 5.826811  | 10.061605 | H  | -4.415417 | 16.142208 | 14.887964 | C | 1.502857  | 0.303295  | 7.507361   |
| H  | 12.763358 | 9.043785  | 9.319977  | C  | -0.898059 | 13.788242 | 2.693817  | C | 3.798923  | -0.992884 | 7.574459   |
| C  | 11.270031 | 8.718846  | 14.129533 | H  | -0.106434 | 11.907306 | 3.021936  | H | 5.559725  | 0.042093  | 7.697736   |
| H  | 12.714241 | 10.157362 | 13.789544 | H  | -0.562387 | 14.302487 | 0.725972  | C | -5.062936 | 21.281071 | 7.547026   |
| H  | 12.214853 | 6.923366  | 14.490887 | H  | -2.937804 | 13.703728 | 3.021935  | H | -3.284239 | 20.274976 | 7.626350   |
| C  | 9.238629  | 10.345856 | 5.203695  | O  | 0.289746  | 15.660092 | 4.209792  | C | -7.327105 | 19.947220 | 7.467275   |
| C  | 11.458517 | 11.683500 | 4.653338  | H  | 0.063738  | 15.197016 | 5.958743  | H | -7.296705 | 17.900866 | 7.493845   |
| H  | 13.290490 | 10.917984 | 5.148777  | Au | 5.367912  | 7.885213  | 16.776072 | C | 13.081596 | 21.236886 | 7.381881   |
| H  | 11.312796 | 14.017834 | 3.466490  | Cu | 7.278879  | 5.501673  | 12.569530 | H | 11.307262 | 20.217720 | 7.323854   |
| H  | 13.026315 | 15.046647 | 3.034951  | P  | 1.503534  | 6.097146  | 17.819240 | C | -0.773874 | -1.043701 | 7.386889   |
| C  | 8.964165  | 15.037870 | 2.835692  | P  | 1.419494  | 3.711571  | 7.586619  | H | 20.139610 | -0.062734 | 7.304364   |
| H  | 8.863273  | 16.862885 | 1.917840  | P  | 14.358552 | 1.023306  | 13.904587 | C | -0.398060 | 4.579076  | 4.815063   |
| C  | 6.760239  | 13.725049 | 3.391444  | F  | 12.132625 | 2.357773  | 15.560984 | C | 0.456773  | 3.569798  | 2.517591   |
| H  | 4.925755  | 14.521950 | 2.962352  | F  | 12.623113 | 1.667791  | 11.385265 | H | 2.074933  | 2.317304  | 2.900081   |
| C  | 6.896558  | 11.374114 | 4.565979  | F  | 16.600219 | -0.246839 | 12.207568 | C | -3.606147 | -7.389199 | 24.688433  |
| H  | 5.177657  | 10.361568 | 5.018909  | F  | 16.115379 | 0.785091  | 16.395122 | H | -2.938856 | -8.181071 | 22.923910  |
| C  | 11.249917 | 5.300167  | 4.638174  | F  | 13.180672 | -1.738465 | 14.453000 | C | 17.002234 | -5.797596 | 24.713998  |
| C  | 11.497733 | 5.939431  | 2.082290  | F  | 15.556887 | 3.799343  | 13.322842 | H | 16.023895 | -5.363912 | 22.969751  |
| H  | 10.714504 | 7.689260  | 1.376805  | N  | 6.051684  | 0.362362  | 13.478835 | C | 18.990480 | 6.752066  | 2.569632   |
| C  | 9.921038  | -7.215823 | 24.848027 | N  | 5.175428  | 2.699579  | 12.980860 | H | 17.355156 | 7.976680  | 2.598845   |
| H  | 10.115676 | -6.679519 | 22.882473 | N  | 1.167324  | 4.990329  | 12.650974 | C | -2.488333 | 6.186979  | 4.829393   |
| C  | 13.766478 | 2.063640  | 1.318550  | C  | 4.022265  | -1.072833 | 13.932145 | H | -3.176434 | 7.022268  | 6.559447   |
| H  | 3.029125  | 14.175802 | 24.448516 | H  | 4.242894  | -3.045363 | 14.395976 | C | 3.741655  | 20.378405 | 7.839605   |
| C  | 13.513167 | 1.407996  | 3.854504  | C  | 1.776521  | 0.314863  | 13.729311 | H | 3.566815  | 19.157812 | 6.188595   |
| H  | 14.291072 | -0.347482 | 4.566037  | H  | -0.135169 | -0.335457 | 13.976490 | H | 3.214704  | 19.290181 | 9.515849   |
| C  | 12.245262 | 3.010253  | 5.510199  | C  | 2.608606  | 2.711225  | 13.123285 | H | 11.304062 | -2.946649 | 7.643603   |
| H  | 12.042215 | 2.448391  | 7.464441  | C  | -0.426708 | 5.616975  | 14.895697 | O | 6.296644  | 21.221214 | 7.942291   |
| C  | 9.367122  | 13.036948 | 17.026853 | H  | -1.457320 | 7.360491  | 14.498123 | H | 15.380907 | -2.677729 | 9.447981   |
| C  | 7.084141  | 14.351385 | 16.889876 | H  | -1.809198 | 4.118732  | 15.232532 | C | 11.961313 | -0.421079 | 21.660500  |
| H  | 5.319214  | 13.317770 | 16.790807 | C  | -0.465945 | 4.661969  | 10.379330 | H | 11.128570 | 1.428815  | 21.265597  |
| C  | 15.962774 | -7.924479 | 16.829363 | H  | -1.914258 | 3.223116  | 10.713551 | H | 11.558496 | -0.912356 | 23.621653  |
| H  | 14.192925 | -6.908638 | 16.698027 | H  | -1.401631 | 6.456467  | 9.985852  | H | 14.009275 | -0.280636 | 21.415053  |
| C  | 18.236827 | -6.603773 | 16.890585 | C  | 1.712513  | 3.015912  | 19.281281 | O | 10.898438 | -2.356146 | 20.129735  |
| H  | 18.221735 | -4.559703 | 16.788178 | C  | -0.456666 | 1.610501  | 19.850595 | H | 11.188771 | -1.915049 | 18.384910  |

**Table S1.** Selected crystallographic data and refinement parameter for **1**, **1·2H<sub>2</sub>O** and **1·4MeOH**

| Compound                                    | <b>1</b>                                                                                                      | <b>1·2H<sub>2</sub>O</b>                                                                                                     | <b>1·4MeOH</b>                                                                                                               |
|---------------------------------------------|---------------------------------------------------------------------------------------------------------------|------------------------------------------------------------------------------------------------------------------------------|------------------------------------------------------------------------------------------------------------------------------|
| Formula                                     | C <sub>58</sub> H <sub>52</sub> Au <sub>2</sub> Cu <sub>2</sub> F <sub>12</sub> N <sub>6</sub> P <sub>6</sub> | C <sub>58</sub> H <sub>56</sub> Au <sub>2</sub> Cu <sub>2</sub> F <sub>12</sub> N <sub>6</sub> O <sub>2</sub> P <sub>6</sub> | C <sub>62</sub> H <sub>68</sub> Au <sub>2</sub> Cu <sub>2</sub> F <sub>12</sub> N <sub>6</sub> O <sub>4</sub> P <sub>6</sub> |
| Formula weight                              | 1767.89                                                                                                       | 1803.92                                                                                                                      | 1896.05                                                                                                                      |
| Crystal system                              | triclinic                                                                                                     | triclinic                                                                                                                    | Triclinic                                                                                                                    |
| Space group                                 | <i>P</i> $\bar{1}$                                                                                            | <i>P</i> $\bar{1}$                                                                                                           | <i>P</i> $\bar{1}$                                                                                                           |
| <i>a</i> /Å                                 | 10.8076(7)                                                                                                    | 10.9155(4)                                                                                                                   | 10.6061(5)                                                                                                                   |
| <i>b</i> /Å                                 | 11.6775(8)                                                                                                    | 11.8013(5)                                                                                                                   | 12.9767(6)                                                                                                                   |
| <i>c</i> /Å                                 | 13.5011(10)                                                                                                   | 13.5470 (6)                                                                                                                  | 13.741 (7)                                                                                                                   |
| <i>α</i> /°                                 | 64.779 (2)                                                                                                    | 115.465(2)                                                                                                                   | 112.947(2)                                                                                                                   |
| <i>β</i> /°                                 | 74.739(3)                                                                                                     | 91.221(2)                                                                                                                    | 95.182(2)                                                                                                                    |
| <i>γ</i> /°                                 | 74.868(3)                                                                                                     | 106.447(2)                                                                                                                   | 106.205(2)                                                                                                                   |
| <i>V</i> /Å <sup>3</sup>                    | 1465.33(18)                                                                                                   | 1490.32(11)                                                                                                                  | 1629.29(14)                                                                                                                  |
| <i>Z</i>                                    | 1                                                                                                             | 1                                                                                                                            | 1                                                                                                                            |
| <i>ρ</i> <sub>calc</sub> /g.cm <sup>3</sup> | 2.003                                                                                                         | 2.010                                                                                                                        | 1.932                                                                                                                        |
| <i>F</i> (000)                              | 856                                                                                                           | 876                                                                                                                          | 928                                                                                                                          |
| <i>μ</i> /mm <sup>-1</sup>                  | 11.694                                                                                                        | 11.524                                                                                                                       | 10.574                                                                                                                       |
| <i>R</i> <sup>a</sup>                       | 0.0237                                                                                                        | 0.0453                                                                                                                       | 0.0288                                                                                                                       |
| <i>wR</i> <sup>b</sup>                      | 0.0606                                                                                                        | 0.1189                                                                                                                       | 0.0739                                                                                                                       |
| <i>GOF</i> <sup>c</sup>                     | 1.069                                                                                                         | 1.112                                                                                                                        | 1.072                                                                                                                        |

<sup>a</sup> $R_1 = \sum ||F_o| - |F_c|| / \sum |F_o|$ . <sup>b</sup> $wR_2 = \{\sum w(F_o^2 - F_c^2)^2 / \sum w(F_o^2)\}^{1/2}$ . <sup>c</sup> $GOF = \{\sum w((F_o^2 - F_c^2)^2) / (n-p)\}^{1/2}$ , where *n* = number of reflection and *p* = total number of parameters refined.

**Table S2.** Selected bond lengths (Å) of **1**, **1·2H<sub>2</sub>O** and **1·4MeOH**.

|          | <b>1</b>   | <b>1·2H<sub>2</sub>O</b> | <b>1·4MeOH</b> |
|----------|------------|--------------------------|----------------|
| Cu1-Cu1A | 2.6842(8)  | 2.6575(15)               | 2.6723(10)     |
| Au1-Cu1  | 2.8135(4)  | 2.8420(8)                | 2.8227(5)      |
| Au1-Cu1A | 2.8843(5)  | 2.8894(8)                | 2.8726(5)      |
| Cu1-F1   | 2.3209(19) | 2.390(4)                 | 2.402(2)       |
| Cu1-N2   | 1.936(2)   | 1.936(4)                 | 1.919(3)       |
| Cu1-N3   | 2.060(2)   | 2.051(4)                 | 2.031(3)       |
| Au1-P1   | 2.3113(7)  | 2.3149(12)               | 2.3052(8)      |
| Au1-P2   | 2.3161(7)  | 2.3153(12)               | 2.3093(8)      |



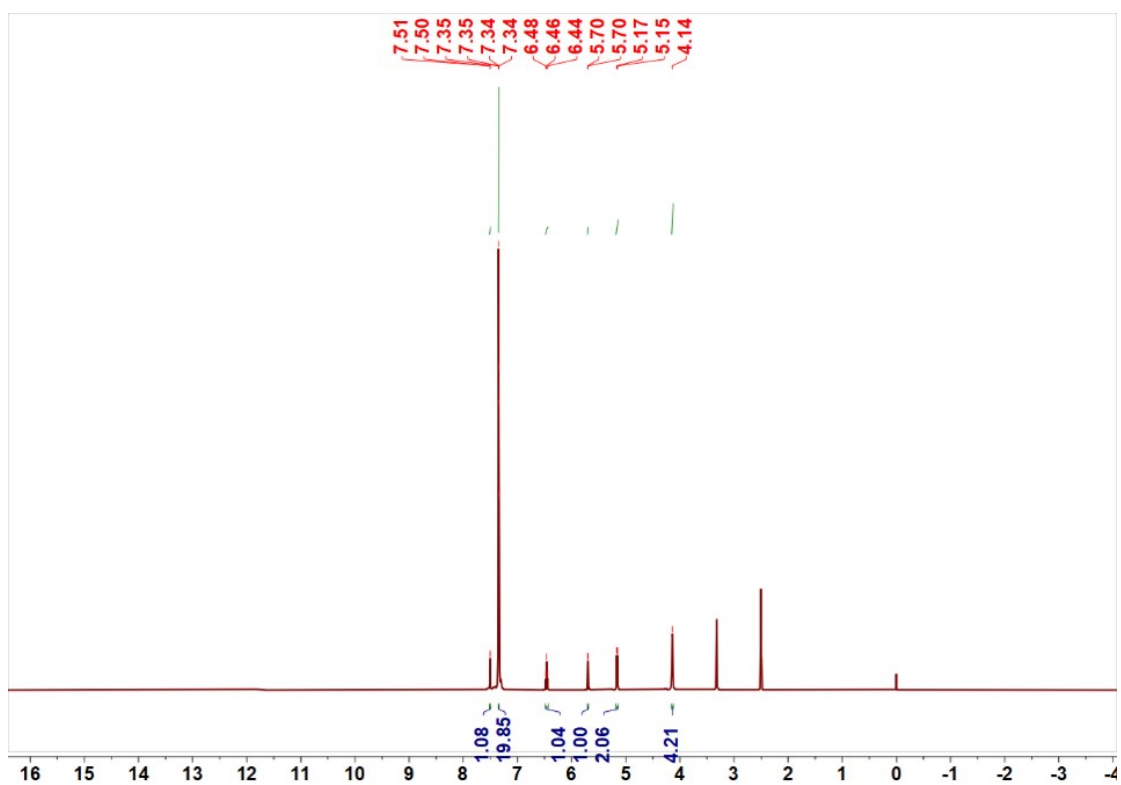

Fig. S1.  $^1\text{H}$  NMR spectra of 3-dppmapz-1-ol in  $\text{DMSO-}d_6$ .

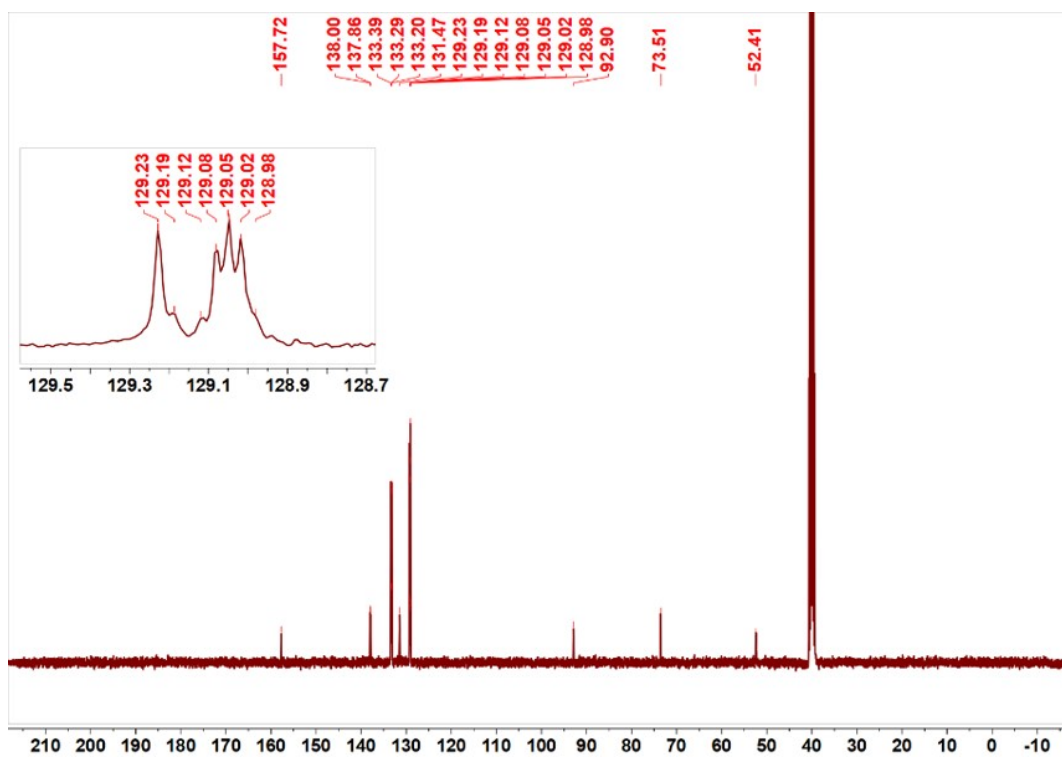

Fig. S2.  $^{13}\text{C}$  NMR spectra of 3-dppmapz-1-ol in  $\text{DMSO-}d_6$ .

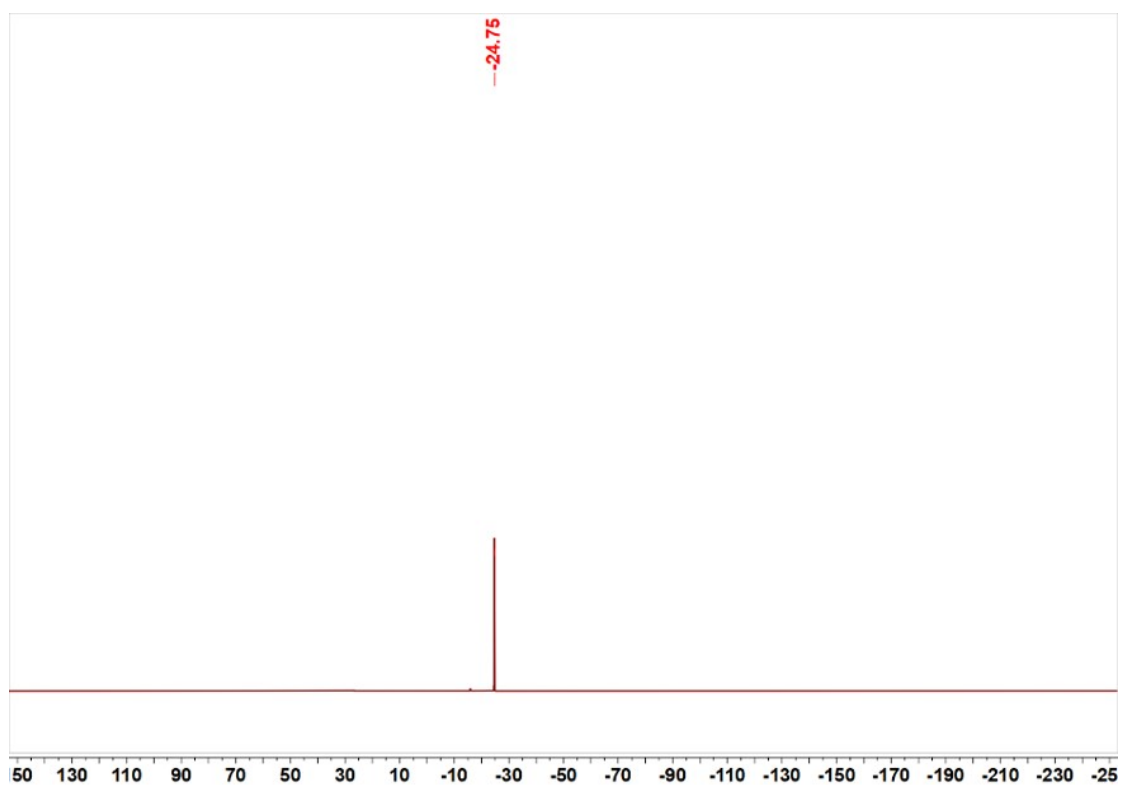

Fig. S3.  $^{31}\text{P}$  NMR spectra of 3-dppmapz-1-ol in  $\text{DMSO-}d_6$ .

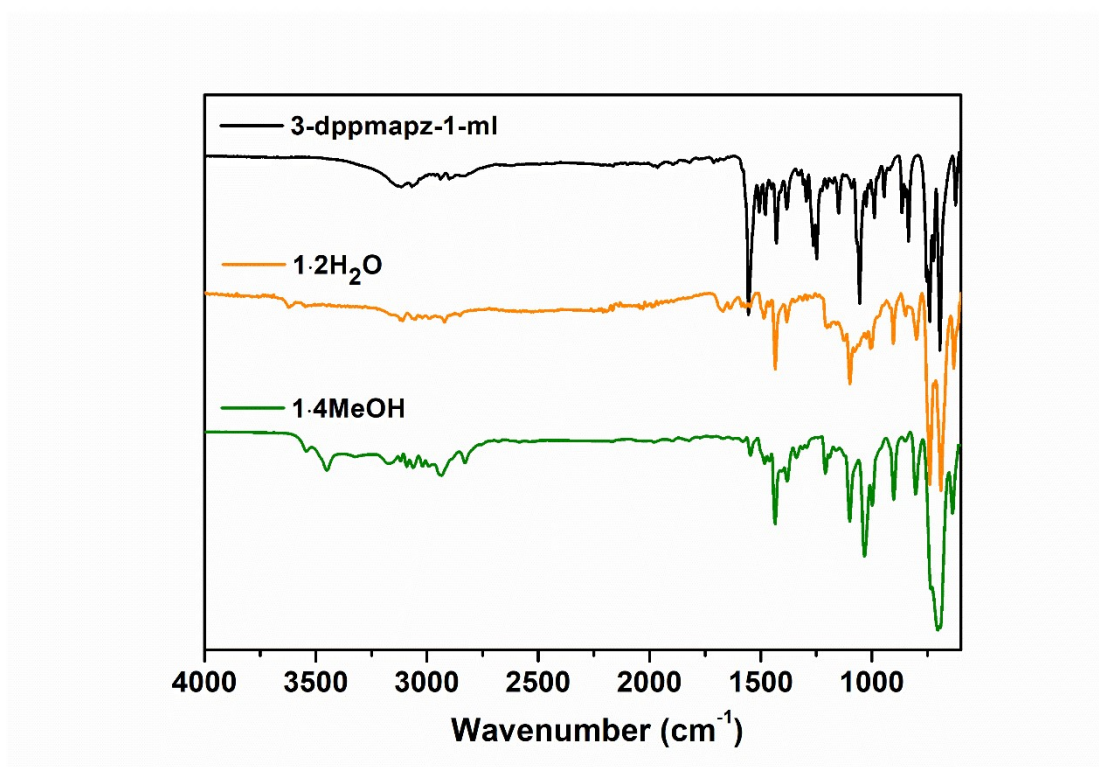

Fig. S4. IR spectra of 3-dppmapz-1-ol (black),  $1\cdot 2\text{H}_2\text{O}$  (orange) and  $1\cdot 4\text{MeOH}$  (green).

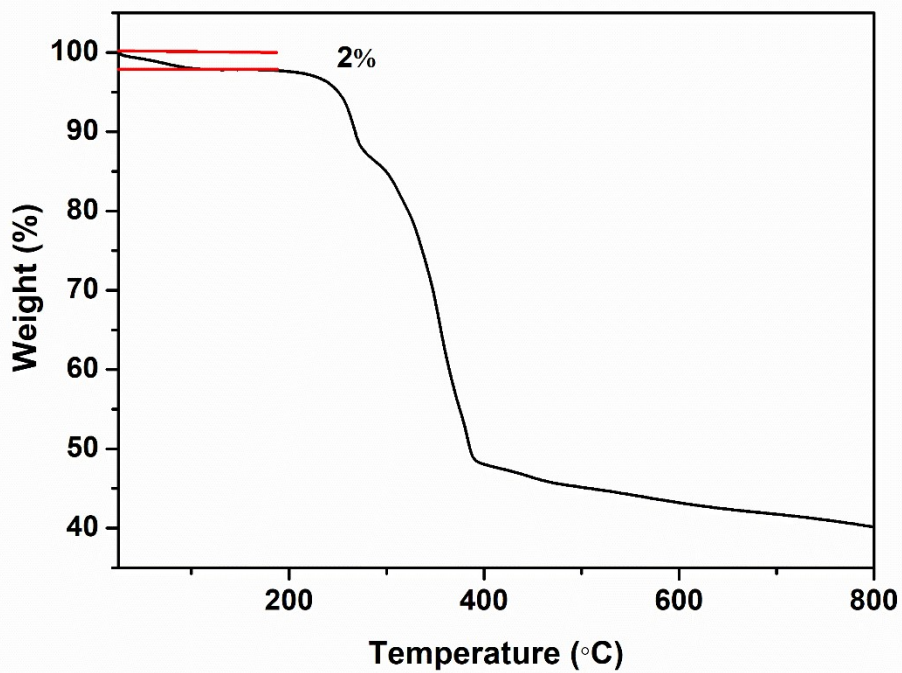

Fig. S5. TGA curve of  $1 \cdot 2\text{H}_2\text{O}$  from room temperature to  $800^\circ\text{C}$ .

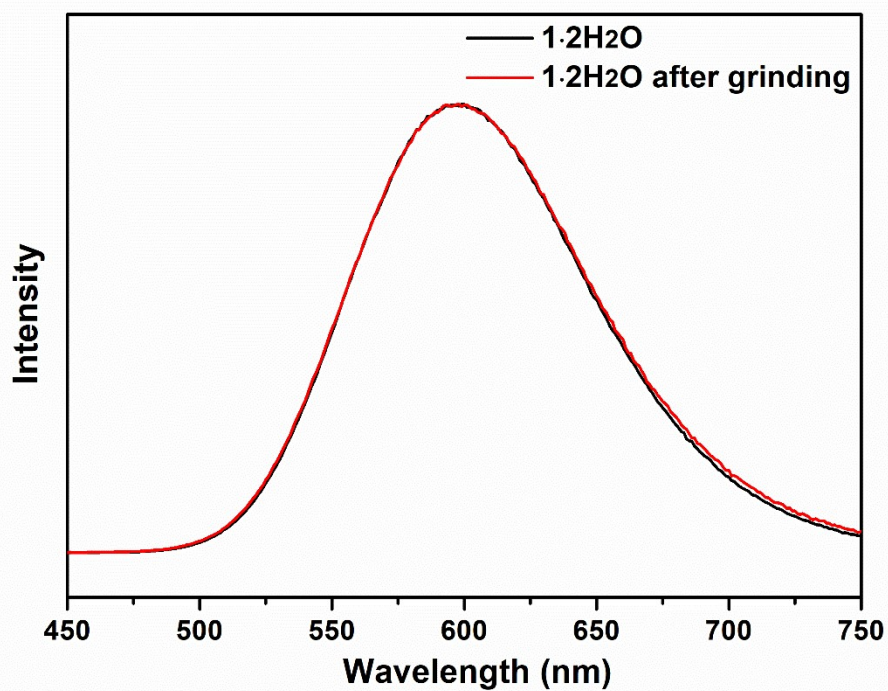

Fig. S6. Solid-state emission spectra of  $1 \cdot 2\text{H}_2\text{O}$  before and after grinding in air for 5 min.

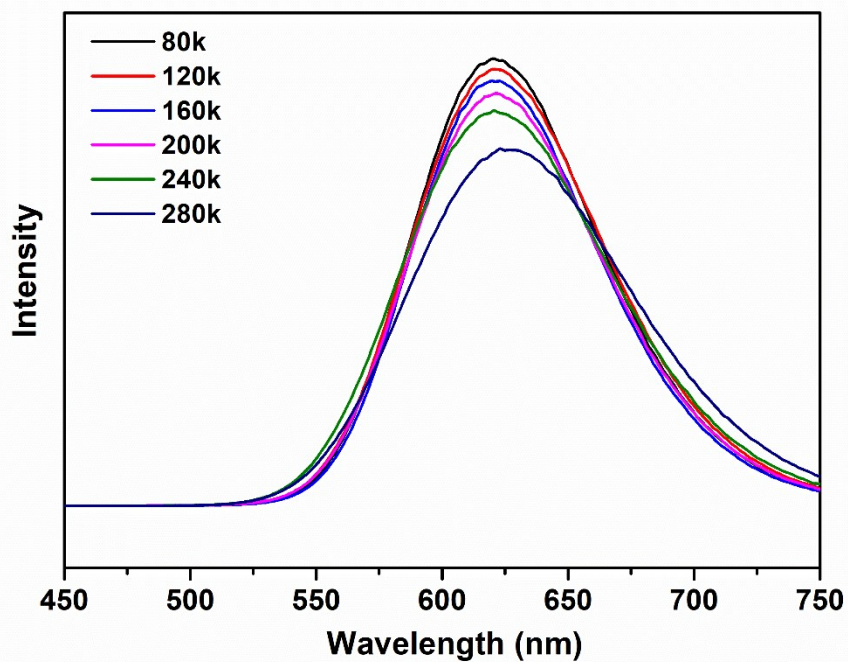

Fig. S7. Solid-state emission spectra of **1** at 80–280 K under 365 nm excitation.

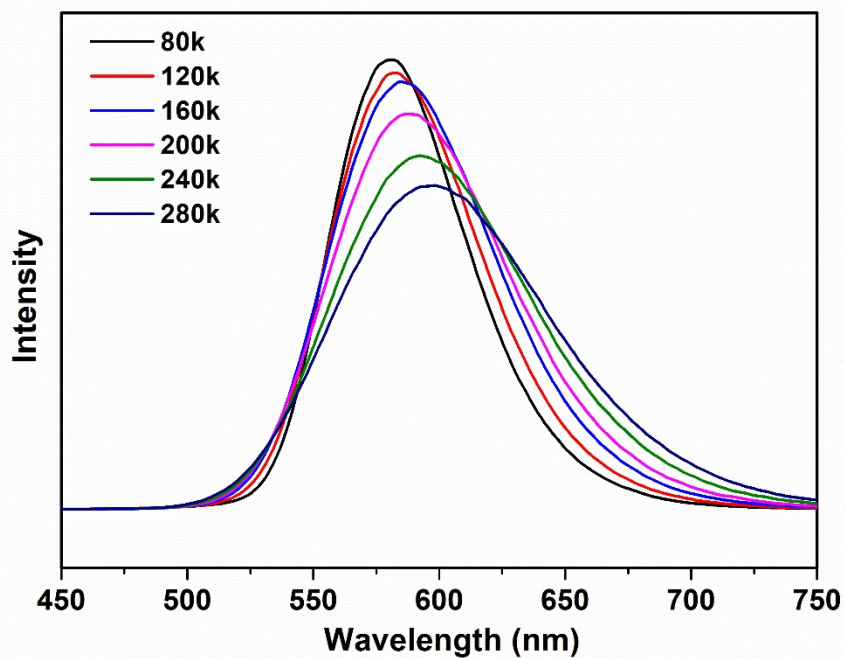

Fig. S8. Solid-state emission spectra of **1**·2H<sub>2</sub>O at 80–280 K under 365 nm excitation.

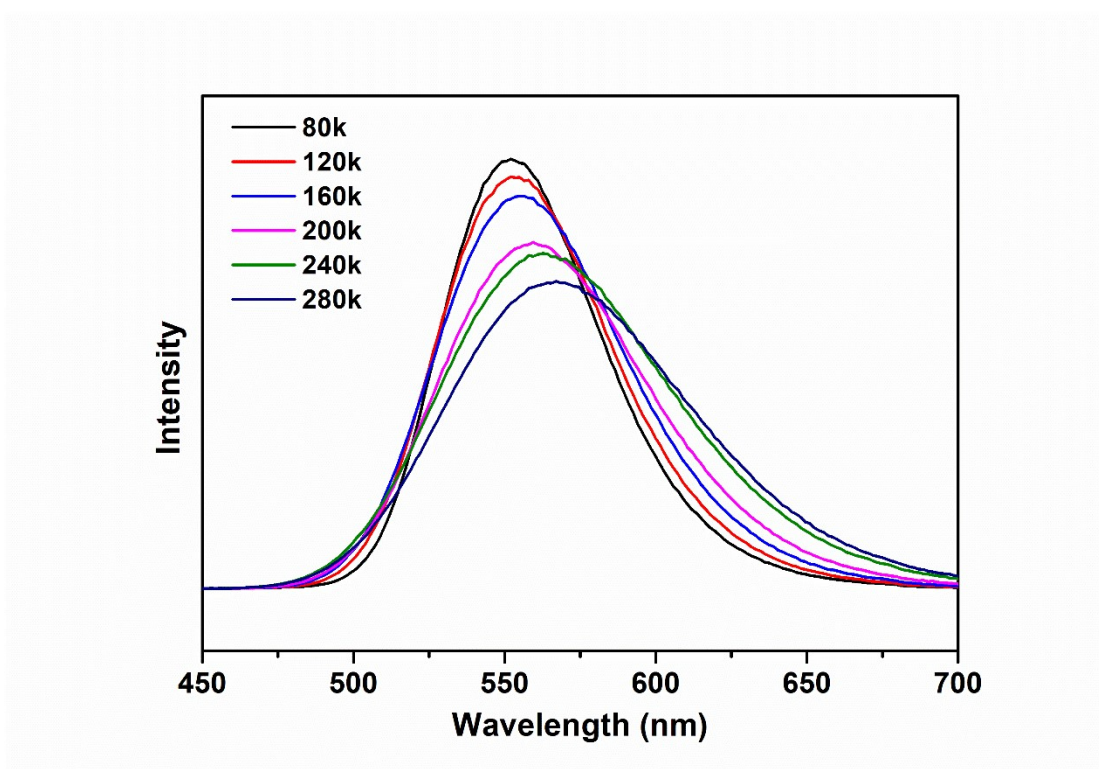

**Fig. S9.** Solid-state emission spectra of 1·4MeOH at 80–280 K under 365 nm excitation.

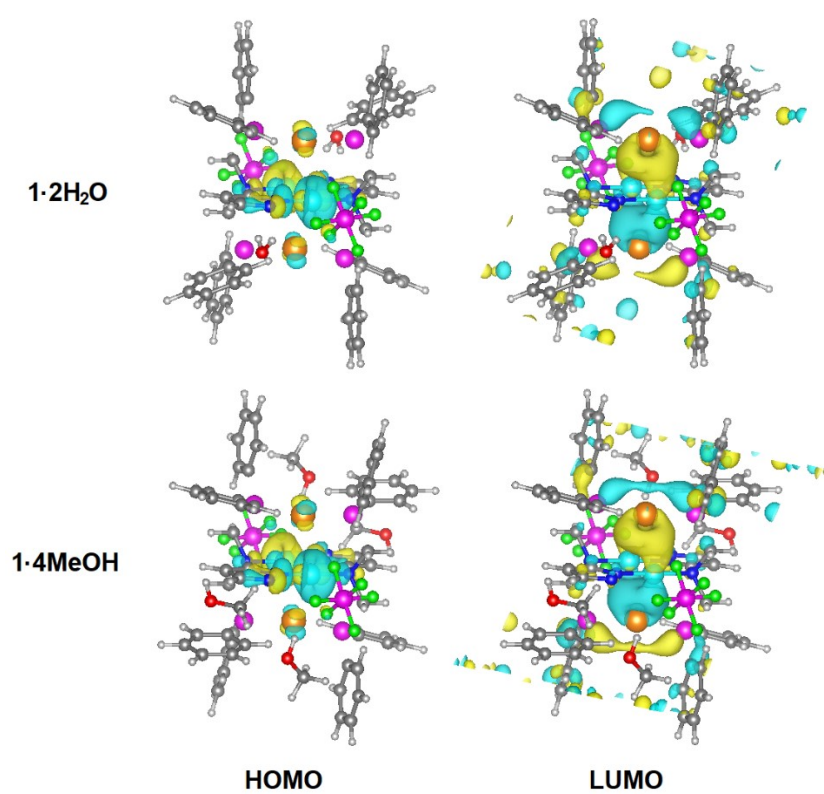

**Fig. S10.** The distribution of HOMOs and LUMOs for 1·2H<sub>2</sub>O and 1·4MeOH.

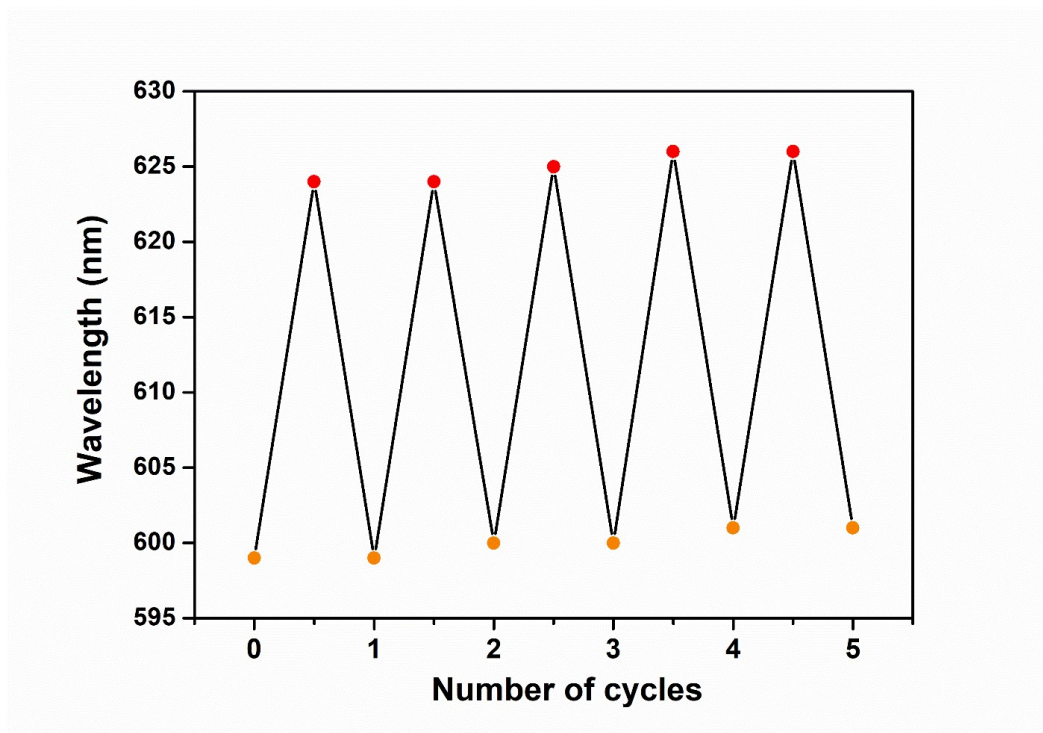

Fig. S11. Emission  $\lambda_{\max}$  of 1·2H<sub>2</sub>O when treated with vacuum and air, alternatively.

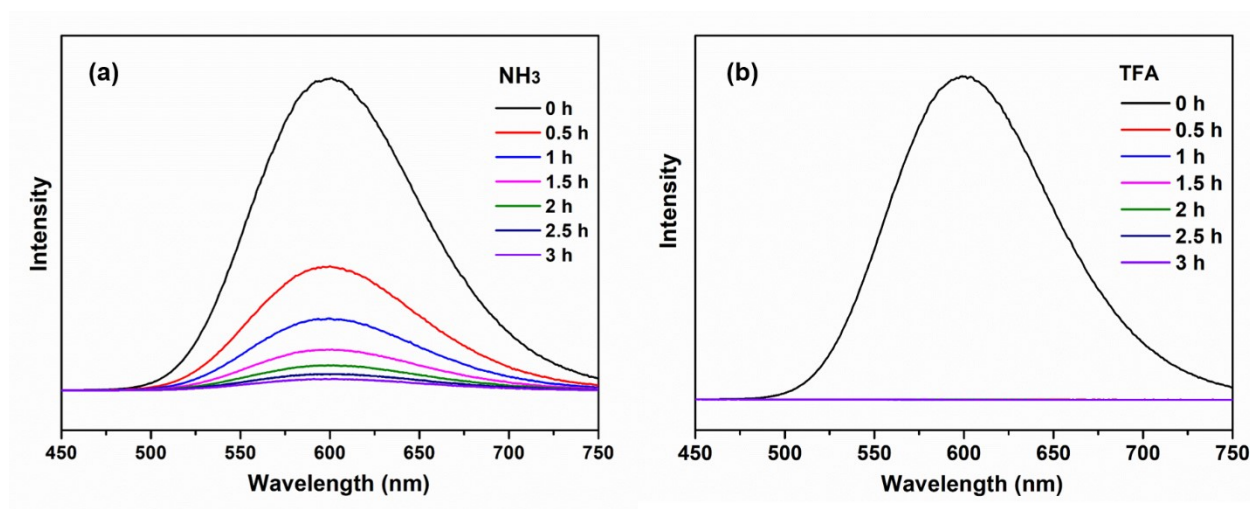

Fig. S12. Solid-state emission spectra of 1 2H<sub>2</sub>O in (a) NH<sub>3</sub> and (b) TFA vapour at 30min time intervals.

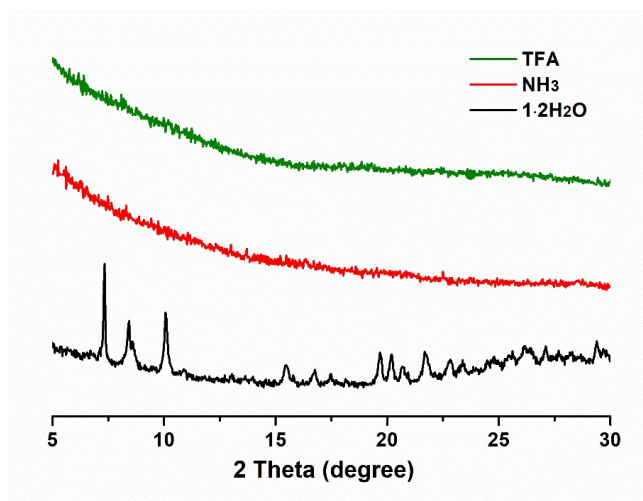

**Fig. S13.** PXRD patterns of 1·2H<sub>2</sub>O and 1·2H<sub>2</sub>O after exposure to NH<sub>3</sub> and TFA vapour.

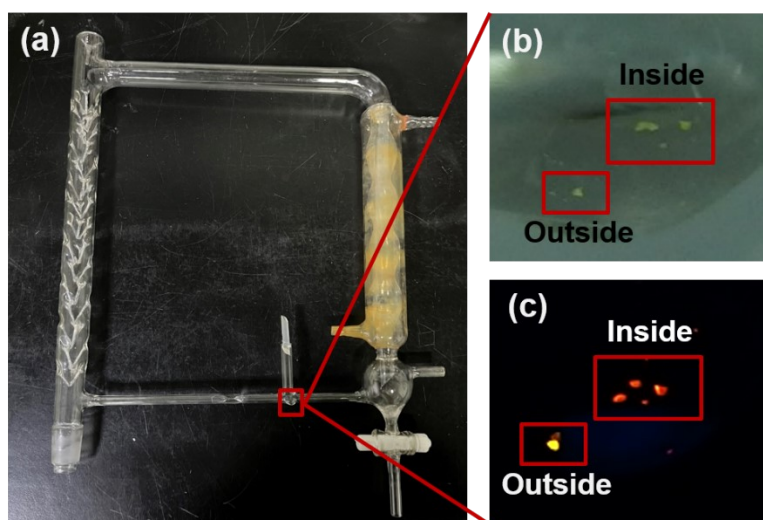

**Fig. S14.** Photo of the (a) reflux equipment and partial magnification of the return line containing several crystals of 1·2H<sub>2</sub>O under (b) natural light and (c) 365 nm LED excitation.
